# Supplementary material for: Effect of Organic and Nano Trace Minerals at Reduced Dietary Levels on Productive Performance and Mineral Balance in Laying Hens
Source: Research Square preprint supplement (doi:10.21203/rs.3.rs-6795812/v1), 2025-08-06
Supplement: Supplementary file 1 [file c42ef6ec9f575d5bd7c91d34.docx]

**Table 6.** Mineral profile of egg yolk, egg albumen and excreta as influenced by different treatments

| Attribute | ITM 100 | OTM 75 | OTM 50 | NTM 50 | NTM 25 | SEM | P-value |
| --- | --- | --- | --- | --- | --- | --- | --- |
| Egg yolk (ppm as such basis) | | | | | | | |
| Copper | 1.62 | 1.55 | 1.55 | 1.52 | 1.45 | 0.027 | 0.458 |
| Zinc | 41.67a | 39.46ab | 37.50bc | 36.82c | 36.49c | 0.504 | 0.001 |
| Manganese | 1.15 | 1.06 | 0.99 | 1.06 | 0.96 | 0.024 | 0.075 |
| Iron | 69.94a | 65.46ab | 59.40bc | 54.93c | 56.70c | 1.420 | 0.001 |
| Egg albumen (ppm, as such basis) | | | | | | | |
| Copper | <0.01 | <0.01 | <0.01 | <0.01 | <0.01 | - | - |
| Zinc | <0.01 | <0.01 | <0.01 | <0.01 | <0.01 | - | - |
| Manganese | <0.01 | <0.01 | <0.01 | <0.01 | <0.01 | - | - |
| Iron | 3.28 | 2.90 | 2.80 | 2.64 | 3.08 | 0.11 | 1.00 |
| Excreta (ppm, dry matter basis) | | | | | | | |
| Copper | 53.23a | 45.12b | 36.15c | 33.15c | 31.93c | 1.910 | <0.001 |
| Zinc | 209.2a | 201.6a | 151.8b | 130.2bc | 117.5c | 8.774 | <0.001 |
| Manganese | 46.30a | 40.32b | 32.00d | 36.02c | 32.90d | 12.30 | <0.001 |
| Iron | 1421.9 | 1369.4 | 1463.7 | 1390.6 | 1490.5 | 15.47 | 0.054 |

Mean values bearing different superscripts within the column differ significantly (P≤0.05)

ITM = Inorganic Trace Minerals, OTM = Organic Trace Minerals, NTM= Nano Trace minerals
